# Supplementary material
Source: publisher site journal article supplement (https://www.dovepress.com/article/358633)
Supplement: Supplementary file 1 [file get_supplementary_file.php]

**Supplementary material:**

**Medication inappropriateness assessment tools**

**The explicit criteria:** The 2019 AGS Beers Criteria involves six issues; i) medications that are potentially inappropriate in older adults, ii) drug-disease or drug–syndrome interactions that may exacerbate the disease or syndrome, iii) drugs to be used with caution in older adults, iv) medications with clinically important drug-drug interactions that should be avoided in older adults, v) medications that should be avoided or have their dosage reduced with varying levels of kidney function in older adults, and iv) drugs with strong anticholinergic properties.

**The implicit criteria:** The MAI contains ten implicit criteria (i) indication, ii) effectiveness, iii) dosage, iv) correct directions, v) drug-drug interactions, vi) drug-disease interactions, vii) practical directions duplication, viii) duration, and expense). Each medication prescribed to the patient was rated by these weighted criteria, resulting in a score per drug and a summed patient score. In the present study, the criterion concerning the cost of medication was not considered since health insurance patients were given their medications free of charge, while non-health insurance had to pay. A total of 1698 medications were rated by 9 weighted criteria, a score of 1 to 3 is given to each criterion. Hence, a weighted MAI score for each medication can range from 0 indicating no prescribing problems to 17 if all 9 criteria are rated as inappropriate. The MAI score per patient was calculated by summing up the total MAI scores of all the medications used by the patient.

Supplementary table 1 MAI criteria to assess medication inappropriateness

|  | MAI criteria |
| --- | --- |
| 1 | Is there an indication for the drug? |
| 2 | Is the medication effective for the condition? |
| 3 | Is the dosage correct? |
| 4 | Are the directions correct? |
| 5 | Are there clinically significant drug-drug interactions |
| 6 | Are there clinically significant drug-disease/condition interactions? |
| 7 | Are the directions practical? |
| 8 | Is there unnecessary duplication with another drug (s)? |
| 9 | Is the duration of therapy acceptable? |
| 10 | Cost of medications |
|  | The average weight of MAI |
|  | 0-30 points |
|  | 31-60 points |
|  | 61 and above points |
